# Supplementary material for: Multicentre positive deviance to reduce adverse events and length of stay after pulmonary resection
Source: PubMed Central journal article supplement — BMJ Open Qual. 2023 Jan 20;12(1):e001997. doi: 10.1136/bmjoq-2022-001997 (PMC9872471; doi:10.1136/bmjoq-2022-001997), 2023-01-20
Supplement: bmjoq-2022-001997supp001.pdf [file bmjoq-2022-001997supp001.pdf]

**Supplemental Table 1.** Overview of adverse event (AE) severity grade classification system.

| Overall Classification System                                                                                                                                                  |                                                                                                                                                     |
|--------------------------------------------------------------------------------------------------------------------------------------------------------------------------------|-----------------------------------------------------------------------------------------------------------------------------------------------------|
| As per the Clavien system, the following definition of complication and overall classification scheme was used to describe any deviation from the normal postoperative course. |                                                                                                                                                     |
| Minor                                                                                                                                                                          |                                                                                                                                                     |
| Grade I                                                                                                                                                                        | Any complication without need for pharmacological treatment or other intervention                                                                   |
| Grade II                                                                                                                                                                       | Any complication that requires pharmacological treatment or minor intervention only                                                                 |
| Major                                                                                                                                                                          |                                                                                                                                                     |
| Grade IIIa                                                                                                                                                                     | Any complication that requires surgical, radiological, endoscopic intervention, or multi-therapy – Intervention does not require general anesthesia |
| Grade IIIb                                                                                                                                                                     | Any complication that requires surgical, radiological, endoscopic intervention, or multi-therapy – Intervention requires general anesthesia         |
| Grade IVa                                                                                                                                                                      | Any complication requiring ICU management and life support – Single organ dysfunction                                                               |
| Grade IVb                                                                                                                                                                      | Any complication requiring ICU management and life support – Multi-organ dysfunction                                                                |
| Grade V                                                                                                                                                                        | Any complication leading to the death of the patient                                                                                                |

**Supplemental Table 2.** Outline of total range of data studied by analysis and seminar type. Ranges include pre- and post-intervention periods for all participating centers (important for local seminars, as each center organized seminars on unique dates).

| Analysis | Seminar Type | Range Start    | Range End     |
|----------|--------------|----------------|---------------|
| LOS*     | Multicenter  | May 2019       | October 2020  |
|          | Local        | December 2018  | August 2020   |
| PAL      | Multicenter  | September 2018 | February 2020 |
|          | Local        | February 2014  | July 2019     |
| AFIB     | Multicenter  | September 2018 | February 2020 |
|          | Local        | February 2014  | May 2015      |

Asterisk (\*) indicates that ranges were the same for both LOS analyses for lobectomy as well as for all procedures.

**Supplemental Table 3.** Local positive deviance seminar recommendations.

| <b>Local Positive Deviance Seminars</b> |                                                                                                                                                                                                                                                                                                                                                                                                                                                                                                                                                                                                                                                                                                                                                                                                                                                                                                                                                                                                                                                                                                                                                                                                                                                                                                                                                                                                                                                                                                                                                                                                                                      |
|-----------------------------------------|--------------------------------------------------------------------------------------------------------------------------------------------------------------------------------------------------------------------------------------------------------------------------------------------------------------------------------------------------------------------------------------------------------------------------------------------------------------------------------------------------------------------------------------------------------------------------------------------------------------------------------------------------------------------------------------------------------------------------------------------------------------------------------------------------------------------------------------------------------------------------------------------------------------------------------------------------------------------------------------------------------------------------------------------------------------------------------------------------------------------------------------------------------------------------------------------------------------------------------------------------------------------------------------------------------------------------------------------------------------------------------------------------------------------------------------------------------------------------------------------------------------------------------------------------------------------------------------------------------------------------------------|
| Topic                                   | Recommendations                                                                                                                                                                                                                                                                                                                                                                                                                                                                                                                                                                                                                                                                                                                                                                                                                                                                                                                                                                                                                                                                                                                                                                                                                                                                                                                                                                                                                                                                                                                                                                                                                      |
| Prolonged alveolar air leak             | <p><i>Pre-op</i></p> <ul style="list-style-type: none"> <li>• In patients with (1) increased risk of post-operative air leak or (2) high volume air leak (suggested to be &gt;400cc/hr at 48 hrs), inform them pre-operatively (1) or 48 hr post-op (2) of the possibility of discharge with pneumostat and appropriate home care support</li> </ul> <p><i>Intra-op</i></p> <ul style="list-style-type: none"> <li>• Avoid manipulation of the lung tissue not to be removed</li> <li>• If there is a tear or a visible injury to the remaining lung, seek to repair it prior to closure</li> <li>• Choose a stapler that is of the staple height appropriate for the size of the tissue</li> <li>• Avoid stapling thick tissues to avoid undue tension; if necessary, use a lung clamp prior</li> <li>• Use cautery in dividing the fissure where possible if too thick to staple</li> <li>• Avoid dissection in a thick fissure if possible for lobar resection</li> <li>• Use reinforced stapler for pursuing pulmonary resection in patients in severe emphysema</li> <li>• Avoid inflation pressures greater than 10-12 cm H<sub>2</sub>O when re-inflating the lung*</li> </ul> <p><i>Post-op</i></p> <ul style="list-style-type: none"> <li>• Reduce/eliminate suction in post-operative period*</li> <li>• The presence of suction should not be considered a contraindication to chest tube removal when no air leak is present</li> <li>• If high volume air leak (suggested to be &gt;400cc/hr at 48 hrs) is present post-operatively, consider early discharge (target 72 hrs) with chest tube and pneumostat</li> </ul> |
| Atrial fibrillation                     | <p><i>Post-op</i></p> <ul style="list-style-type: none"> <li>• Diligent and rapid electrolyte (K, Ca, Mg, Ph) replacement on daily bases; highlight with residents, especially when on-call</li> </ul>                                                                                                                                                                                                                                                                                                                                                                                                                                                                                                                                                                                                                                                                                                                                                                                                                                                                                                                                                                                                                                                                                                                                                                                                                                                                                                                                                                                                                               |

|                |                                                                                                                                                                                                                                                                                                                                                                                                                                                                                                                                                                                                                                                                                                                                                                                                                                                                                                                                                                                                                                                                                                                                                                                                                                                                                                                                                                                                                                                                                                                                                                                                                                                                                                                                                                                                                                                                                                                 |
|----------------|-----------------------------------------------------------------------------------------------------------------------------------------------------------------------------------------------------------------------------------------------------------------------------------------------------------------------------------------------------------------------------------------------------------------------------------------------------------------------------------------------------------------------------------------------------------------------------------------------------------------------------------------------------------------------------------------------------------------------------------------------------------------------------------------------------------------------------------------------------------------------------------------------------------------------------------------------------------------------------------------------------------------------------------------------------------------------------------------------------------------------------------------------------------------------------------------------------------------------------------------------------------------------------------------------------------------------------------------------------------------------------------------------------------------------------------------------------------------------------------------------------------------------------------------------------------------------------------------------------------------------------------------------------------------------------------------------------------------------------------------------------------------------------------------------------------------------------------------------------------------------------------------------------------------|
|                | <ul style="list-style-type: none"> <li>• Efficient use of blood work, laboratory testing across the board</li> </ul>                                                                                                                                                                                                                                                                                                                                                                                                                                                                                                                                                                                                                                                                                                                                                                                                                                                                                                                                                                                                                                                                                                                                                                                                                                                                                                                                                                                                                                                                                                                                                                                                                                                                                                                                                                                            |
| Length of stay | <p><b>Thoracoscopic Wedge Resection (i.e. non-anatomic pulmonary resection)</b></p> <p><i>Pre-op</i></p> <ul style="list-style-type: none"> <li><input type="checkbox"/> Patient education and expectation setting*</li> <li><input type="checkbox"/> Inform patients of expectations of being discharged on POD 1</li> <li><input type="checkbox"/> Inform patients of importance of daily exercise in preparation for surgery</li> </ul> <p><i>Intra-op</i></p> <ul style="list-style-type: none"> <li><input type="checkbox"/> Use purple or black stapler to divide lung tissue, based on thickness</li> <li><input type="checkbox"/> Avoid routine use of foley catheters</li> <li><input type="checkbox"/> 1 chest tube, either 24 or 28 French</li> <li><input type="checkbox"/> In selected cases, consider leaving no chest tube after confirming no air leak under water with lung insufflation and no concern regarding bleeding</li> </ul> <p><i>Post-op</i></p> <ul style="list-style-type: none"> <li><input type="checkbox"/> Minimal or no suction on chest tube post-operatively (-8 cm H<sub>2</sub>O or less)</li> <li><input type="checkbox"/> Post-operative oral analgesia, no pca</li> </ul> <p><b>Thoracoscopic Segmentectomy (i.e. anatomic pulmonary resection with individual ligation of bronchovascular structures)</b></p> <p><i>Pre-op</i></p> <ul style="list-style-type: none"> <li>• Inform patients of expectations of being discharged on POD 1</li> <li>• Inform patients of importance of daily exercise in preparation for surgery</li> </ul> <p><i>Intra-op</i></p> <ul style="list-style-type: none"> <li>• Use purple or black stapler to divide lung tissue, based on thickness</li> <li>• Avoid routine use of foley catheters (unless expectation of complex segment, lasting greater than 2-1/2 hours)</li> <li>• 1 chest tube, either 24 or 28 French</li> </ul> |

- Use of regular cautery (no hook)

*Post-op*

- Minimal or no suction on chest tube post-operatively (-8 cm H<sub>2</sub>O or less)
- Postoperative oral analgesia, no pca

**VATS/MIS Lobectomy**

*Pre-op*

- Patient education and expectation setting\*
- Vigorously promote smoking cessation pre-operatively
- Promote walking 45 mins/day
- To use inspiratory muscle training for post-operative predicted FEV<sub>1</sub> <50%
- Teach patients that expected LOS is 2-3 days

*Intra-op*

- Routinely leave one chest tube

*Post-op*

- Use of digital suction recommended
- Minimal pleural pressure settings (minimize suction)
- Remove chest tube as per protocolized management
- Oral analgesia, no pca
- Liberal criteria for chest tube removal and discharge home
- Use of portable chest drainage system

**Open Lobectomy**

*Pre-op*

- Patient education and expectation setting

*Intra-op*

- Liberal use of anterior thoracotomy

*Post-op*

- Liberal criteria for chest tube removal and discharge home
- Use of portable chest drainage system
- No strict limits on chest tube output

**Laparoscopic Paraesophageal Hernia Repair and Laparoscopic Heller Myotomy/Dor***Pre-op*

- Teach patients that expected LOS is 2 days

*Intra-op*

- Simultaneous endoscopy and laparoscopy to confirm mucosal integrity

*Post-op*

- Continuous ondansetron for 24 hours
- Clear fluids on POD 0
- Full fluids on POD 1
- Selective NG tube, avoid in routine cases
- Selective barium swallow, avoid in routine cases

**Any Esophagectomy***Intra-op*

- Consider a more concerted effort to perform MIS esophagectomy
- Use of soft close suction tube (JP tube) instead of chest tube

*Post-op*

- No NG tube and barium swallow\*
- No calorie count before discharge home

**Pneumonectomy***Post-op*

- Communicate with ICU re minimum LOS in the ICU

Asterisk (\*) indicates that a recommendation was generated by  $\geq 2$  centers.
