# Supplementary material for: Multicentre positive deviance to reduce adverse events and length of stay after pulmonary resection
Source: PubMed Central journal article supplement — BMJ Open Qual. 2023 Jan 20;12(1):e001997. doi: 10.1136/bmjoq-2022-001997 (PMC9872471; doi:10.1136/bmjoq-2022-001997), 2023-01-20
Supplement: bmjoq-2022-001997supp002.pdf [file bmjoq-2022-001997supp002.pdf]

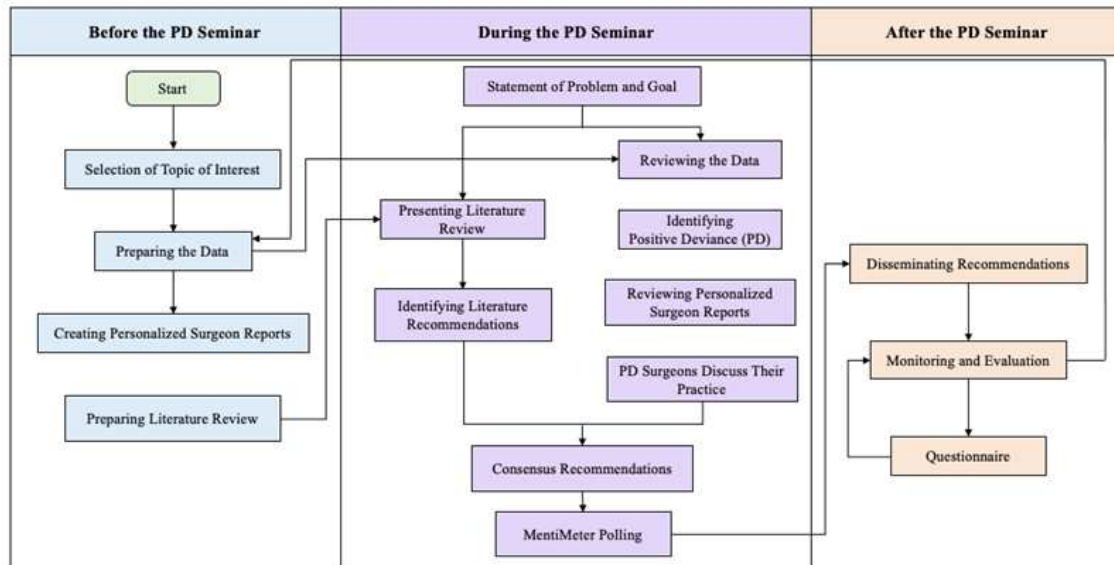

**Supplemental Figure 1.** Flowchart of PD seminar workflow, from pre-seminar preparation to post-seminar implementation.

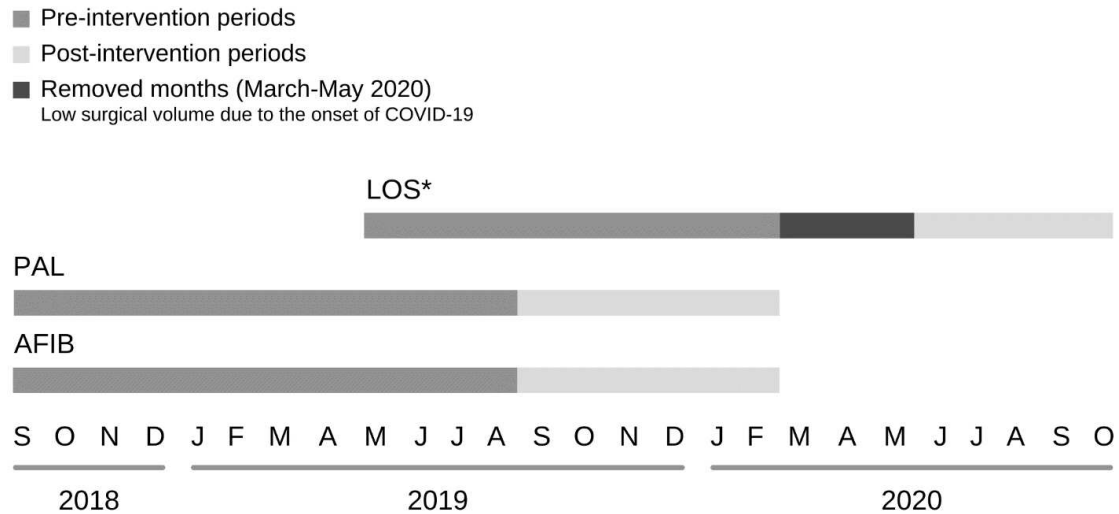

**Supplemental Figure 2.** Pre- and post-intervention ranges by multicenter seminar. March to May 2020 were removed from the multicenter seminars analyses due to low surgical volume induced by the advent of COVID-19. Asterisk (\*) Indicates that ranges were the same for LOS analyses of both lobectomy as well as of all procedures (lobectomy, segmentectomy, and wedge resection). If the seminar took place on a date before the 15th of the month, then the respective month was considered the first month of post-intervention; conversely, if the seminar took place on a date after the 15th, then the respective month was considered the last month of pre-intervention.

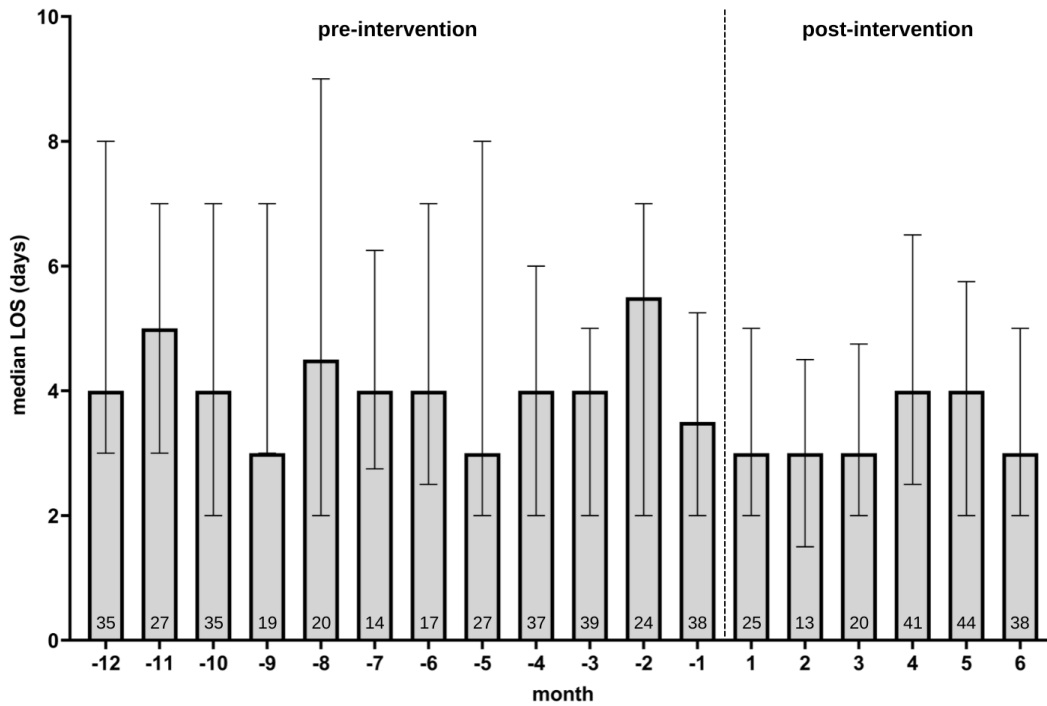

*Supplemental Figure 3. Local seminar analysis of median LOS for lobectomy. Error bars represent interquartile range (IQR).*

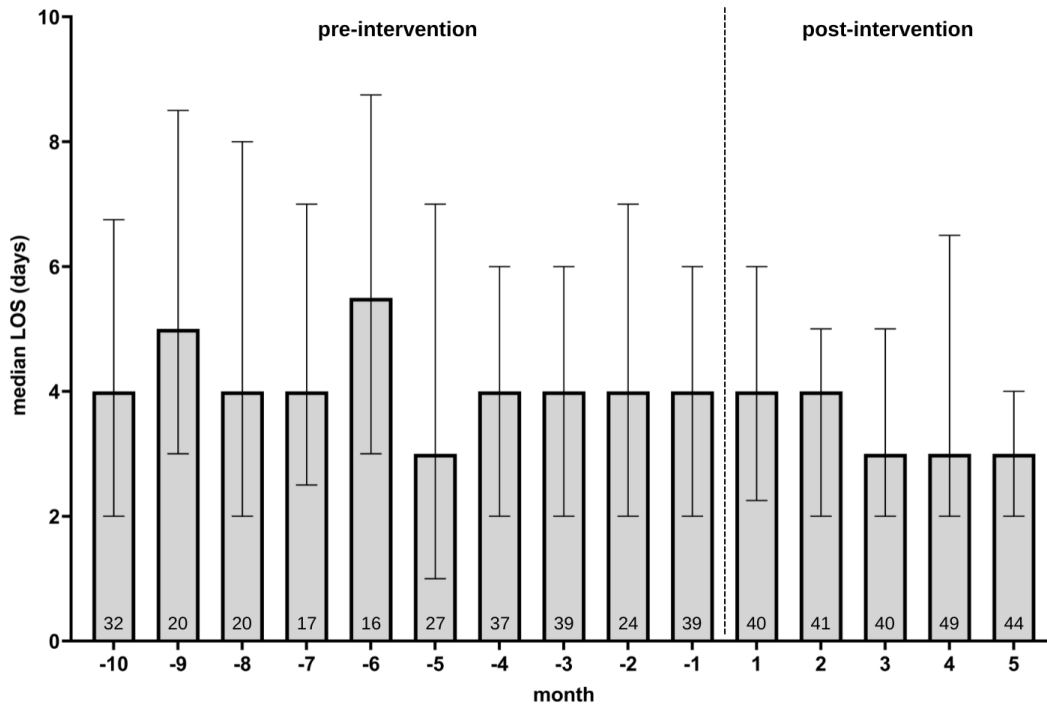

**Supplemental Figure 4.** Multicenter seminar analysis of median LOS for lobectomy. Three months (March-May 2020) between Month -1 and Month 1 have been removed due to low surgical volume induced by the onset of COVID-19. Error bars represent interquartile range (IQR).

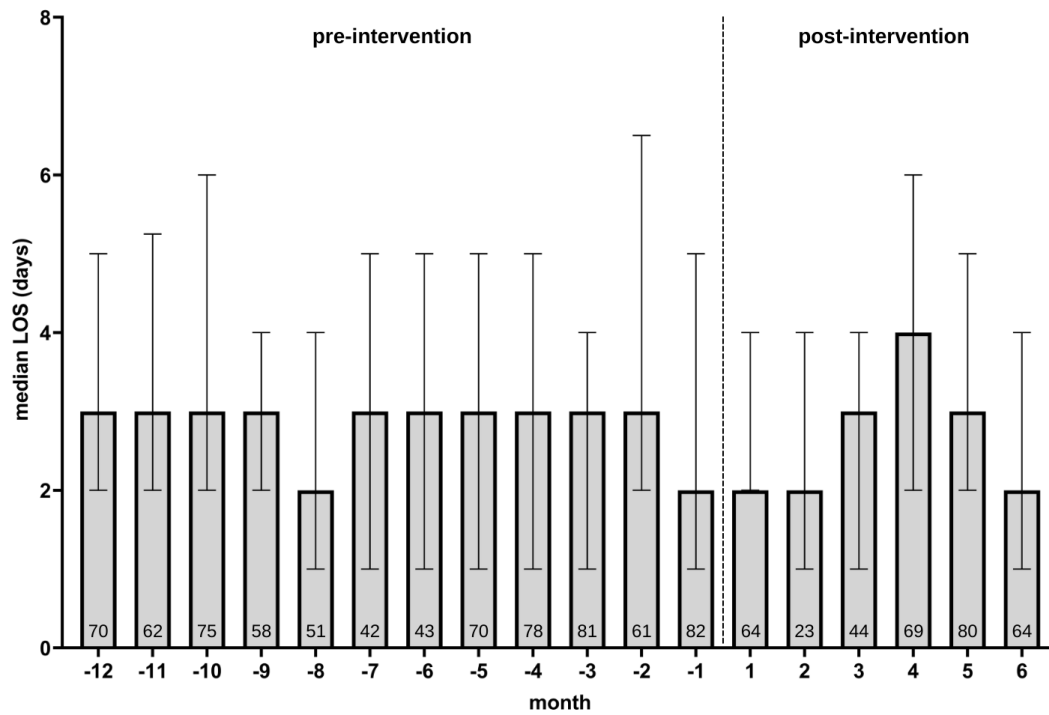

*Supplemental Figure 5. Local seminar analysis of median LOS across lobectomy, segmentectomy, and wedge resection. Error bars represent interquartile range (IQR).*

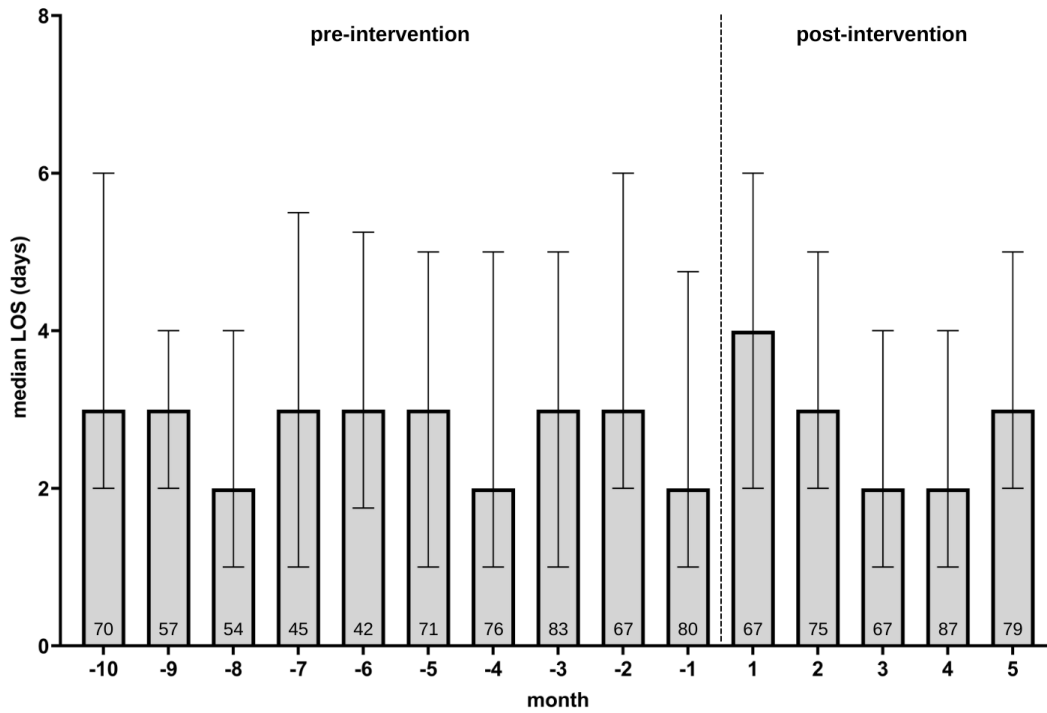

**Supplemental Figure 6.** Multicenter seminar analysis of median LOS across lobectomy, segmentectomy, and wedge resection. Three months (March-May 2020) between Month -1 and Month 1 have been removed due to low surgical volume induced by the onset of COVID-19. Error bars represent interquartile range (IQR).

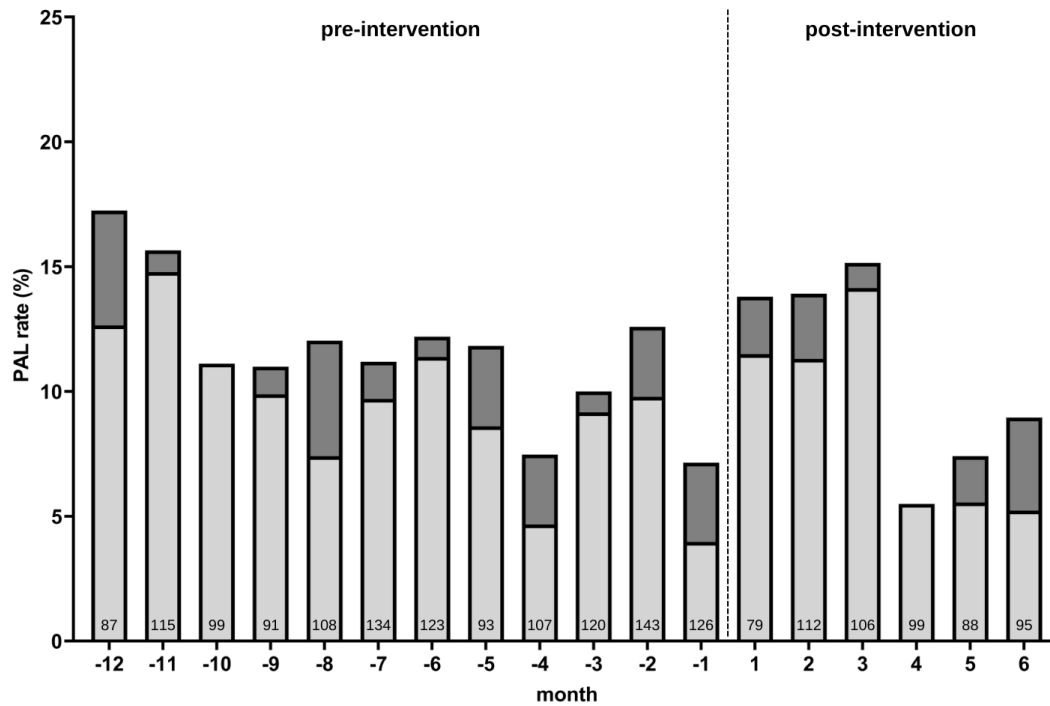

*Supplemental Figure 7. Local seminar analysis of PAL rates by month across lobectomy, segmentectomy, and wedge resection.*

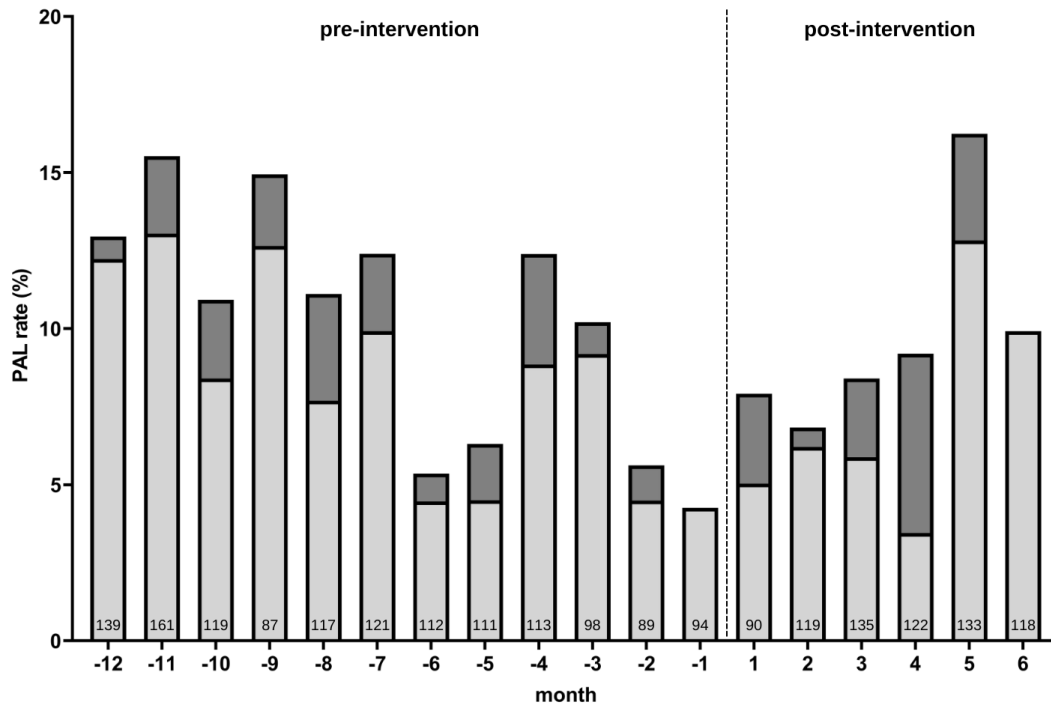

*Supplemental Figure 8. Multicenter seminar analysis of PAL rates by month across lobectomy, segmentectomy, and wedge resection.*



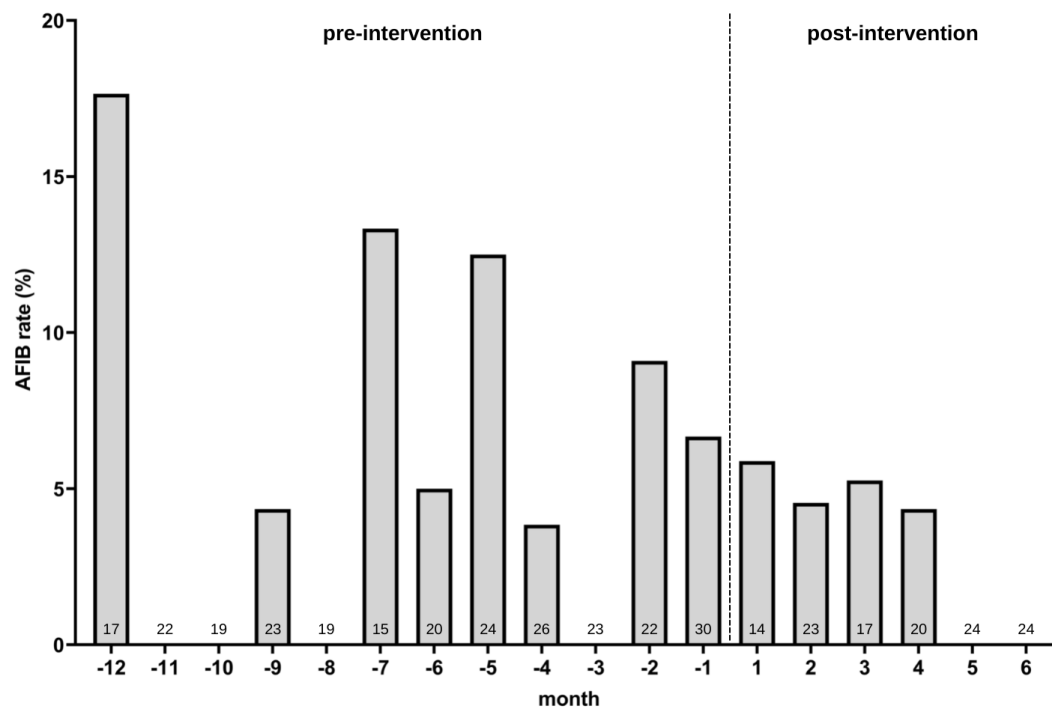

*Supplemental Figure 9. Local seminar analysis of AFIB rates across lobectomy, segmentectomy, and wedge resection.*

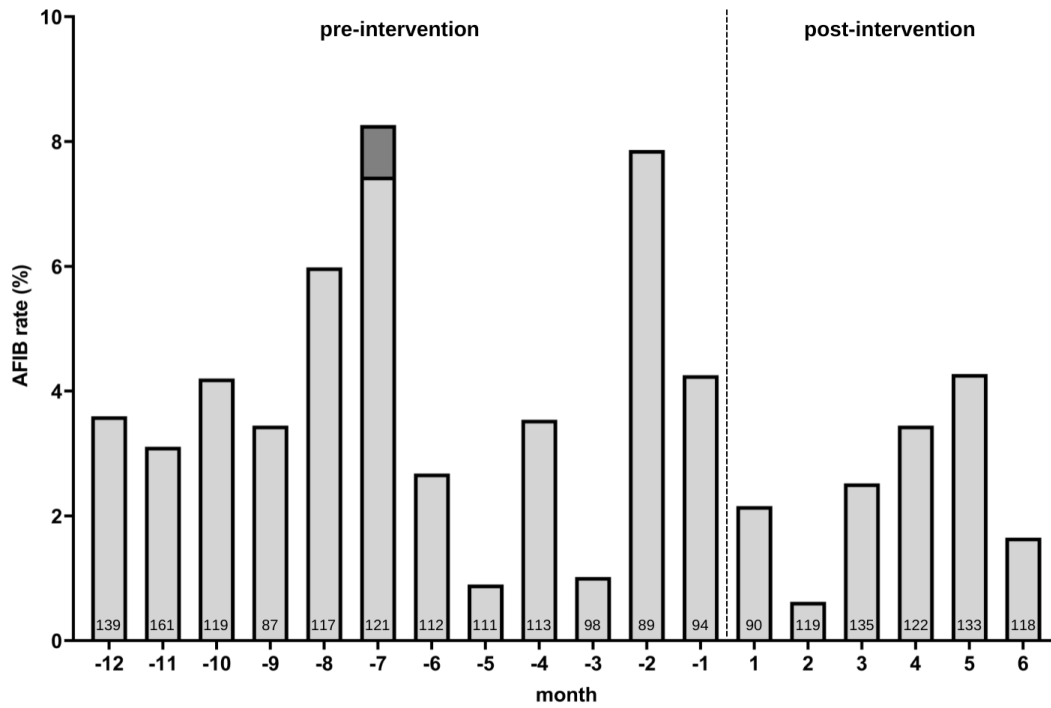

*Supplemental Figure 10. Multicenter seminar analysis of AFIB rates across lobectomy, segmentectomy, and wedge resection.*
